# Supplementary material
Source: MDPI journal article supplement (https://www.mdpi.com/2079-6412/11/10/1146)
Supplement: s1 [file s1]

# Supplementary Materials: Durable and Superhydrophobic Aluminium Alloy with Microscale Hierarchical Structures and Anti-Drag Function Inspired by Diving Bell Spider

You Chen <sup>1</sup>, Zijing Quan <sup>1</sup>, Yuhang Sun <sup>1</sup>, Deqiang Chi <sup>1</sup>, Delei Liu <sup>1</sup>, Liang Zhou <sup>1</sup>, Junqiu Zhang <sup>1</sup>, Zhengzhi Mu <sup>1</sup>, Ze Wang <sup>1</sup>, Bo Li <sup>1,2,\*</sup>, Shichao Niu <sup>1,\*</sup>, Zhiwu Han <sup>1</sup> and Luquan Ren <sup>1</sup>

<sup>1</sup> Key Laboratory of Bionic Engineering, Ministry of Education, Jilin University, Changchun 130022, China; chenyou19@mails.jlu.edu.cn (Y.C.); quanzy19@mails.jlu.edu.cn (Z.Q.); sunyh1818@mails.jlu.edu.cn (Y.S.); chidq19@mails.jlu.edu.cn (D.C.); ldl20@mails.jlu.edu.cn (D.L.); liangzhou19@mails.jlu.edu.cn (L.Z.); junqiuzhang@jlu.edu.cn (J.Z.); zmu@jlu.edu.cn (Z.M.); wangze@jlu.edu.cn (Z.W.); zwhan@jlu.edu.cn (Z.H.); lqren@jlu.edu.cn (L.R.)

<sup>2</sup> Department of Chemistry, University of California, Riverside, CA 92521, USA

\* Correspondence: boli@jlu.edu.cn (B.L.); niushichao@jlu.edu.cn (S.N.)

**Citation:** Chen, Y.; Quan, Z.; Sun, Y.; Chi, D.; Liu, D.; Zhou, L.; Zhang, J.; Mu, Z.; Wang, Z.; Li, B.; et al. Durable and Superhydrophobic Aluminium Alloy with MICROSCALE Hierarchical Structures and Anti-Drag Function Inspired by Diving Bell Spider. *Coatings* **2021**, *11*, 1146. <https://doi.org/10.3390/coatings11101146>

Academic Editor: Alexandra Muñoz-Bonilla

Received: 24 August 2021

Accepted: 16 September 2021

Published: 22 September 2021

**Publisher's Note:** MDPI stays neutral with regard to jurisdictional claims in published maps and institutional affiliations.

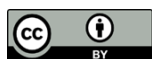

**Copyright:** © 2020 by the authors. Submitted for possible open access publication under the terms and conditions of the Creative Commons Attribution (CC BY) license (<http://creativecommons.org/licenses/by/4.0/>).

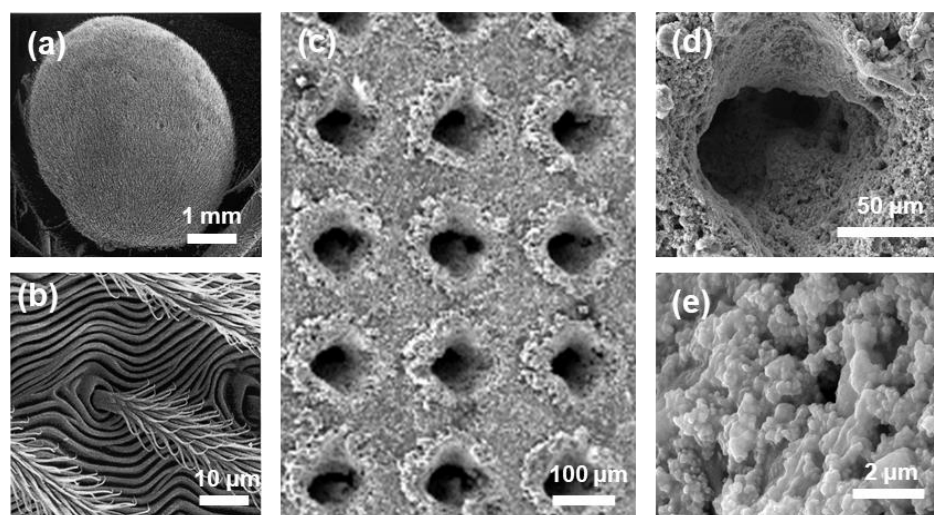

**Figure S1.** SEM images of the water spider [40] and BSAA. (a) SEM image of the abdomen of water spider. (b) SEM image of the microstructures on the abdominal surface of water spider. (c) SEM image of the BSAA. (d) SEM image of the single hole. (e) SEM image of the microstructures on the BSAA surface.

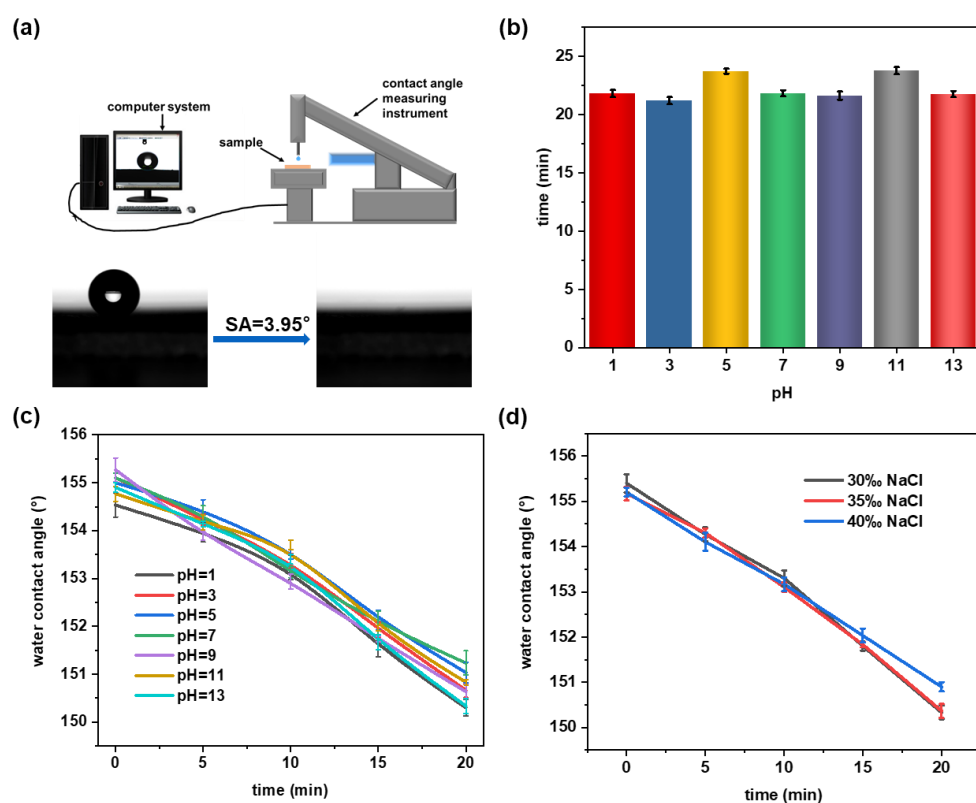

**Figure S2.** (a) A simple diagram of the drop shape analyzer and the sliding angle of the BSAA (b) The time required to change the WCAs by 5 degrees. (c) WCAs of the BSAA changing with the time in different pH. (d) WCAs of the BSAA changing with the time in different NaCl solutions.

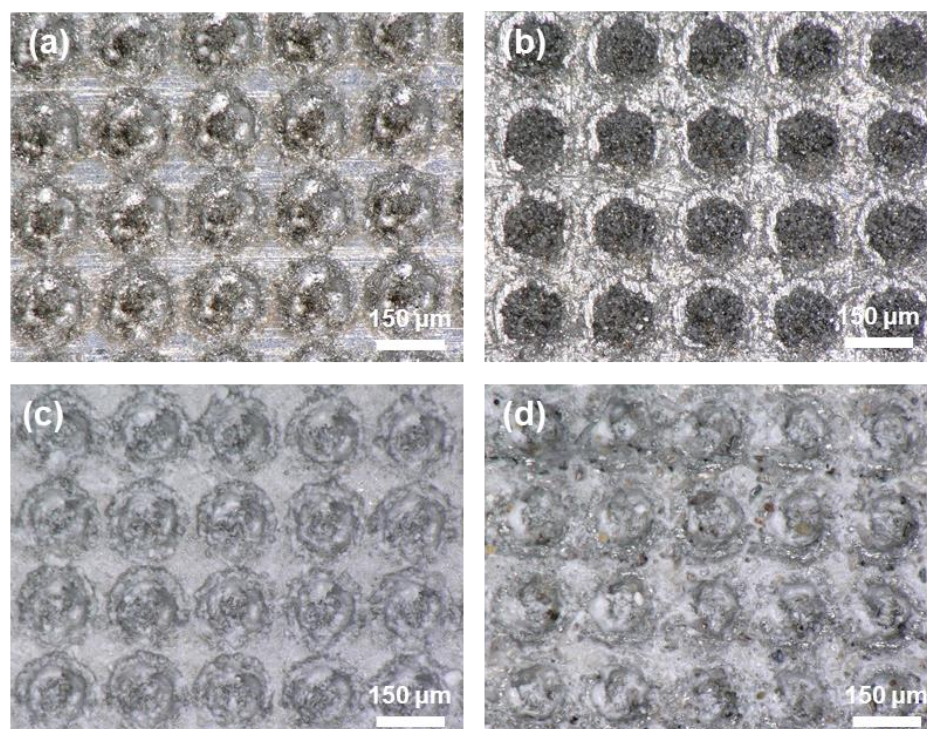

**Figure S3.** Surface morphology of the aluminium alloy and BSAA before and after the mechanical abrasion test. (a) Surface morphology of the aluminium alloy before the mechanical abrasion test. (b) Surface morphology of the aluminium alloy after the mechanical abrasion test. (c) Surface morphology of the BSAA before the mechanical abrasion test. (d) Surface morphology of the BSAA after the mechanical abrasion test.

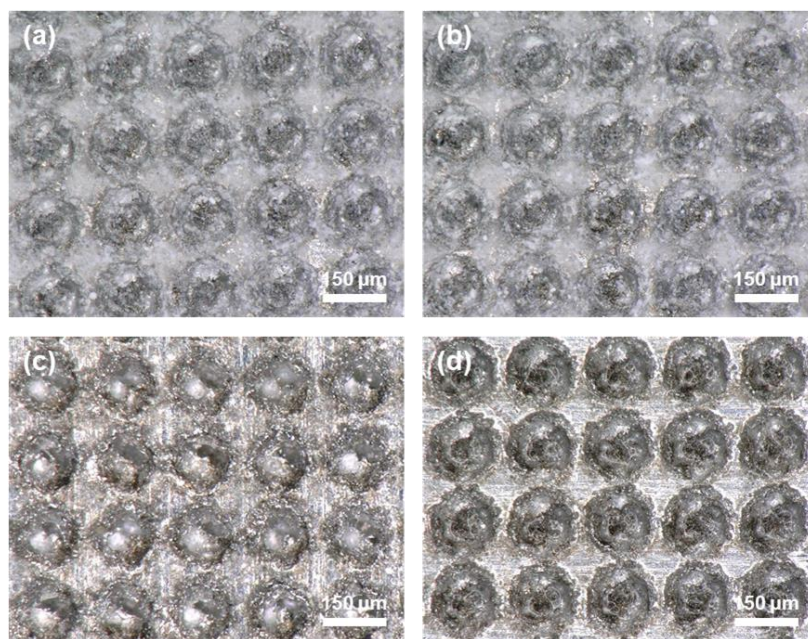

**Figure S4.** Surface morphology of BSAA and aluminium alloy before and after chemical stability test. (a) Surface morphology of BSAA before chemical stability test. (b) Surface morphology of BSAA after chemical stability test. (c) Surface morphology of aluminium alloy before chemical stability test. (d) Surface morphology of aluminium alloy after chemical stability test.
