# Supplementary material
Source: MDPI journal article supplement (https://www.mdpi.com/2079-6412/11/10/1146)
Supplement: s1 [file s1]

Archive with 3 entries (3 files):
- coatings-1372440-supplementary.pdf
- Supplementary Video1-Capturing behaviors for an underwater bubble on the surface of smooth aluminum alloy.mp4
- Supplementary Video2-Capturing behaviors for an underwater bubble on the surface of BSAA.mp4
